# Supplementary material for: Leishmania donovani Activates Hypoxia Inducible Factor-1α and miR-210 for Survival in Macrophages by Downregulation of NF-κB Mediated Pro-inflammatory Immune Response
Source: PubMed Central journal article supplement (PMC5852103; doi:10.3389/fmicb.2018.00385), 2018-03-08
Supplement: Data_Sheet_1.pdf [file Data_Sheet_1.pdf]

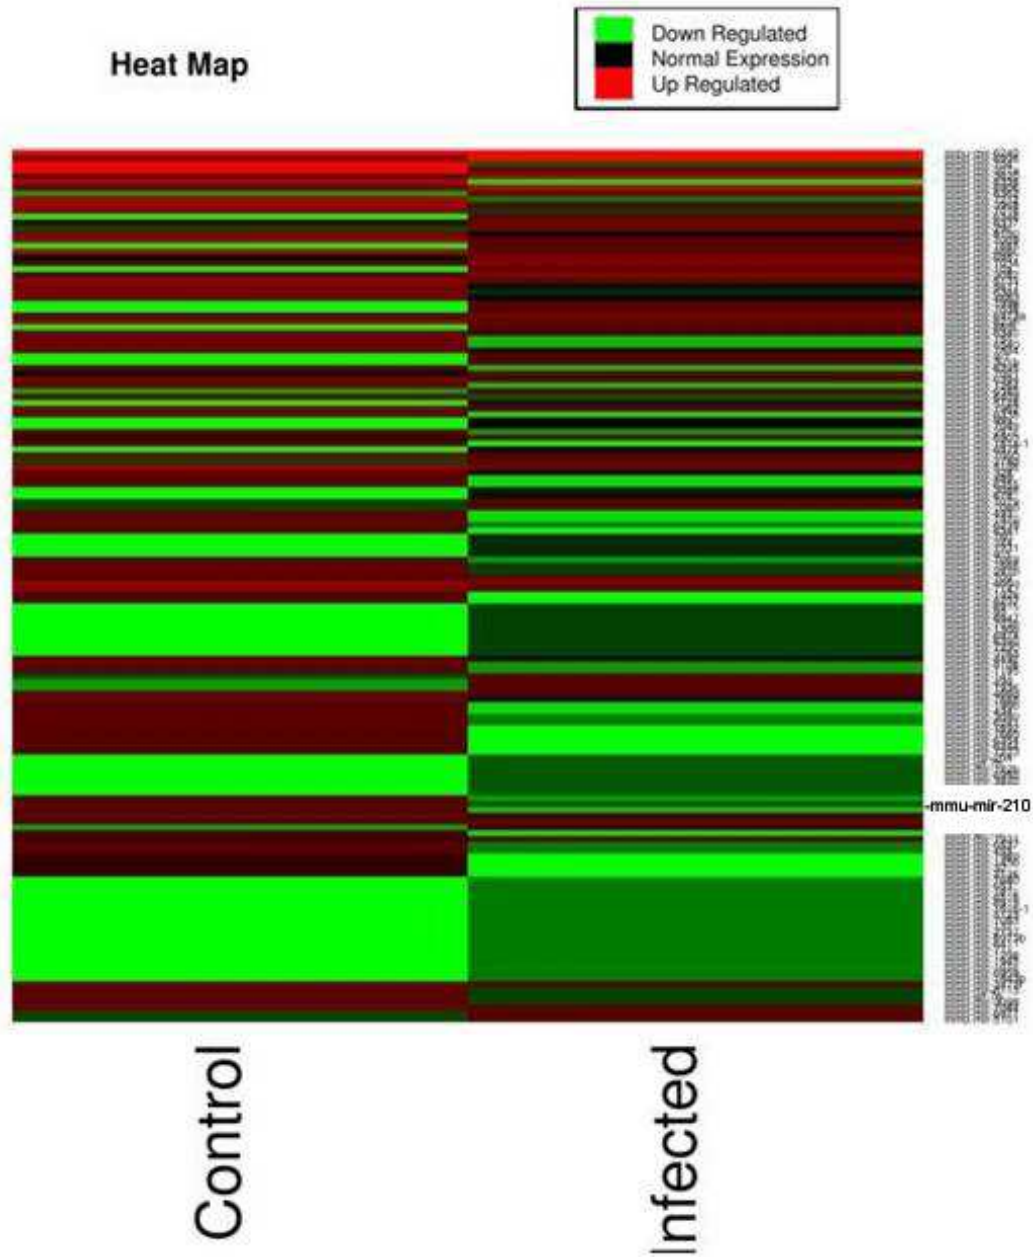

**Supplementary material 1:** Heat map of control and *L.donovani* infected macrophages

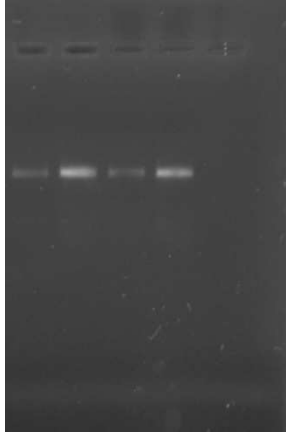

**Supplementary Figure 2:** Original PCR gel of HIF-1 $\alpha$

**There are 346 predicted targets for mmu-miR-210-5p in miRDB.**

| Target Detail           | Target Rank | Target Score | miRNA Name     | Gene Symbol                   | Gene Description                                            |
|-------------------------|-------------|--------------|----------------|-------------------------------|-------------------------------------------------------------|
| <a href="#">Details</a> | 1           | 99           | mmu-miR-210-5p | <a href="#">Akirin2</a>       | akirin 2                                                    |
| <a href="#">Details</a> | 2           | 98           | mmu-miR-210-5p | <a href="#">Fcd5</a>          | ectopic P-granules autophagy protein 5 homolog (C. elegans) |
| <a href="#">Details</a> | 3           | 98           | mmu-miR-210-5p | <a href="#">Bach2</a>         | BTB and CNC homology 2                                      |
| <a href="#">Details</a> | 4           | 98           | mmu-miR-210-5p | <a href="#">Mtmr4</a>         | myotubularin related protein 4                              |
| <a href="#">Details</a> | 5           | 97           | mmu-miR-210-5p | <a href="#">Tnrc6a</a>        | trinucleotide repeat containing 6a                          |
| <a href="#">Details</a> | 6           | 97           | mmu-miR-210-5p | <a href="#">Tnfrsf21</a>      | tumor necrosis factor receptor superfamily, member 21       |
| <a href="#">Details</a> | 7           | 96           | mmu-miR-210-5p | <a href="#">Pdcd10</a>        | programmed cell death 10                                    |
| <a href="#">Details</a> | 8           | 96           | mmu-miR-210-5p | <a href="#">Mob3a</a>         | MOB kinase activator 3A                                     |
| <a href="#">Details</a> | 9           | 95           | mmu-miR-210-5p | <a href="#">Vall3</a>         | vestigial like 3 (Drosophila)                               |
| <a href="#">Details</a> | 10          | 95           | mmu-miR-210-5p | <a href="#">Reln</a>          | reelin                                                      |
| <a href="#">Details</a> | 11          | 94           | mmu-miR-210-5p | <a href="#">Gars</a>          | glycyl-tRNA synthetase                                      |
| <a href="#">Details</a> | 12          | 94           | mmu-miR-210-5p | <a href="#">Gabra4</a>        | gamma-aminobutyric acid (GABA) A receptor, subunit alpha 4  |
| <a href="#">Details</a> | 13          | 94           | mmu-miR-210-5p | <a href="#">Arl11</a>         | ADP-ribosylation factor-like 11                             |
| <a href="#">Details</a> | 14          | 94           | mmu-miR-210-5p | <a href="#">Fn3a3</a>         | fibronectin type III domain containing 3A                   |
| <a href="#">Details</a> | 15          | 94           | mmu-miR-210-5p | <a href="#">2810403A07Rik</a> | RIKEN cDNA 2810403A07 gene                                  |
| <a href="#">Details</a> | 16          | 93           | mmu-miR-210-5p | <a href="#">Rassf4</a>        | Ras association (RalGDS/AF-6) domain family member 4        |
| <a href="#">Details</a> | 17          | 93           | mmu-miR-210-5p | <a href="#">Fchs2</a>         | FCH and double SH3 domains 2                                |
| <a href="#">Details</a> | 18          | 93           | mmu-miR-210-5p | <a href="#">Ndst2</a>         | N-deacetylase/N-sulfotransferase (heparan glucosaminyl) 2   |
| <a href="#">Details</a> | 19          | 93           | mmu-miR-210-5p | <a href="#">Ddx3x</a>         | DEAD/H (Asp-Glu-Ala-Asp/His) box polypeptide 3, X-linked    |
| <a href="#">Details</a> | 20          | 92           | mmu-miR-210-5p | <a href="#">Serinc5</a>       | serine incorporator 5                                       |

**Supplementary figure 3:** List of Target gene of miRNA-210 by online software miRDB. Only top 20 ranked gene shown in the figure.

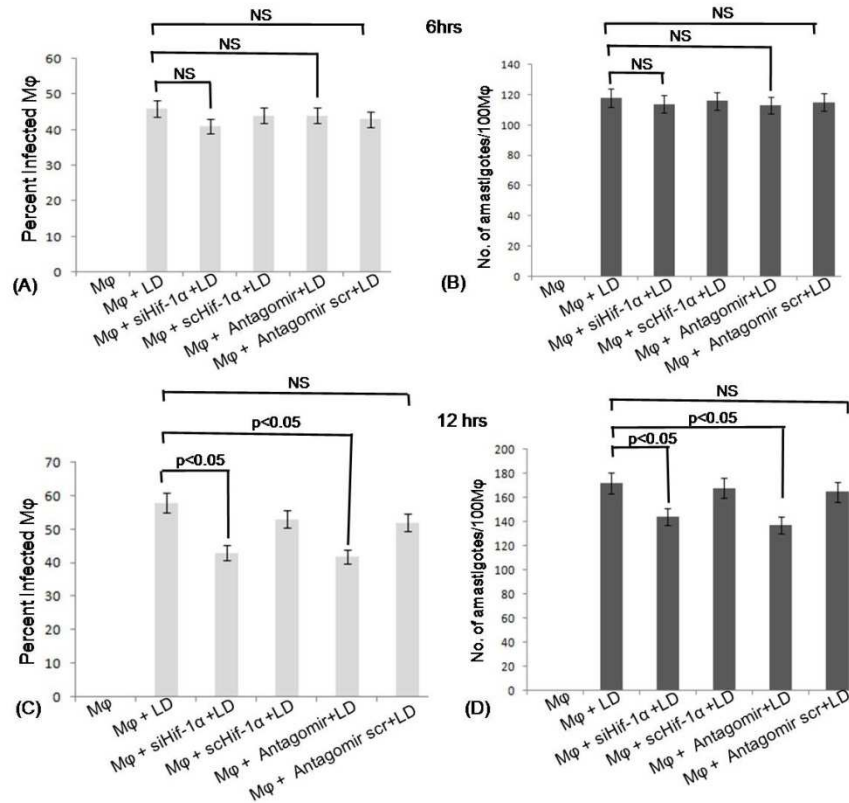

**Supplementary figure 4:** Percentage infectivity and parasite survival at the different time point.

**4 A & B:** The percentage infectivity and survival in siHIF-1 $\alpha$  or antagomir-210 treated macrophages after 6hrs of infection. **4 C & D:** The percentage infectivity and survival in siHIF-1 $\alpha$  or antagomir-210 treated macrophages after 12 hrs of infection. we observed that after 6 h of infection, the percentage infectivity and parasite survival did not change significantly in siHIF-1 $\alpha$  or antagomir-210 treated macrophages however after 12 h of infection in siHIF-1 $\alpha$  or antagomir-210 treated macrophages the percentage infectivity and amastigotes number per 100 macrophages was significantly ( $p < 0.05$ ) reduced.

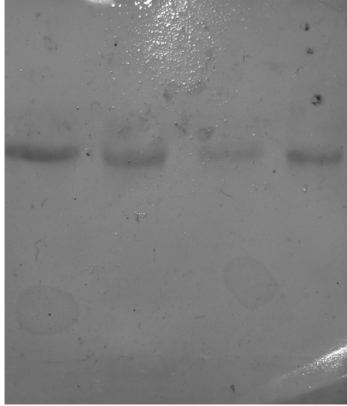

**Supplementary figure 5:** Original image of Western blot for figure 8.A

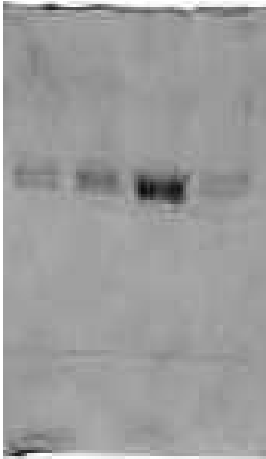

**Supplementary figure 6:** Original image of Western blot for figure 8.B

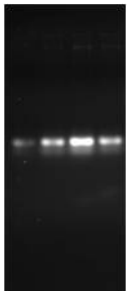

**Supplementary figure 7.** Original image of semi-quantitative PCR of TNF- $\alpha$  for Figure 9.

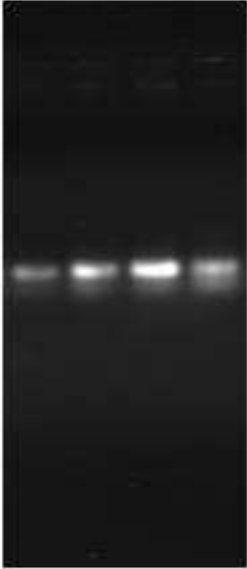

**Supplementary figure 8.** Original image of semi-quantitative PCR of IL-12 for Figure 9.

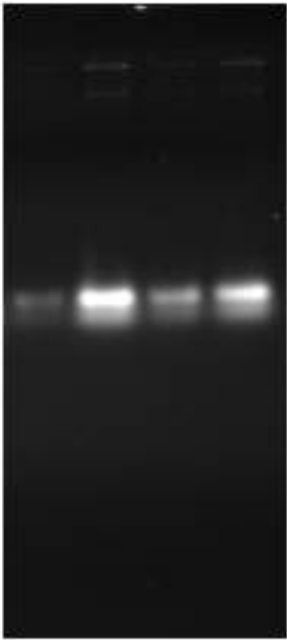

**Supplementary figure 9.** Original image of semi-quantitative PCR of IL-10 for Figure 9
